# Supplementary material for: Yb 3+ dopant concentration dependence in Yb:CaGdAlO 4 bulk crystals
Source: Royal Society of Chemistry journal article supplement (doi:10.1039/d4ce01247j), 2025-01-01
Supplement: d4ce01247j1.pdf [file d4ce01247j1.pdf]

## Supporting Information for

### $\text{Yb}^{3+}$ dopant concentration dependence in $\text{Yb}:\text{CaGdAlO}_4$ bulk crystals

Xiaohu Liu,<sup>ab</sup> Jianfu Li,<sup>b</sup> Zhaojie Zhu,<sup>b</sup> Chaoyang Tu,<sup>b</sup> G. Lakshminarayana<sup>c</sup>, and Yan Wang<sup>\*b</sup>

a. College of Chemistry, Fuzhou University, Fuzhou 350108, China.

b. Chinese Academy of Sciences Fujian Institute of Research on the Structure of Matter, Fuzhou 350002, China.

c. Future Technology School, Shenzhen Technology University, Shenzhen 518118, China.

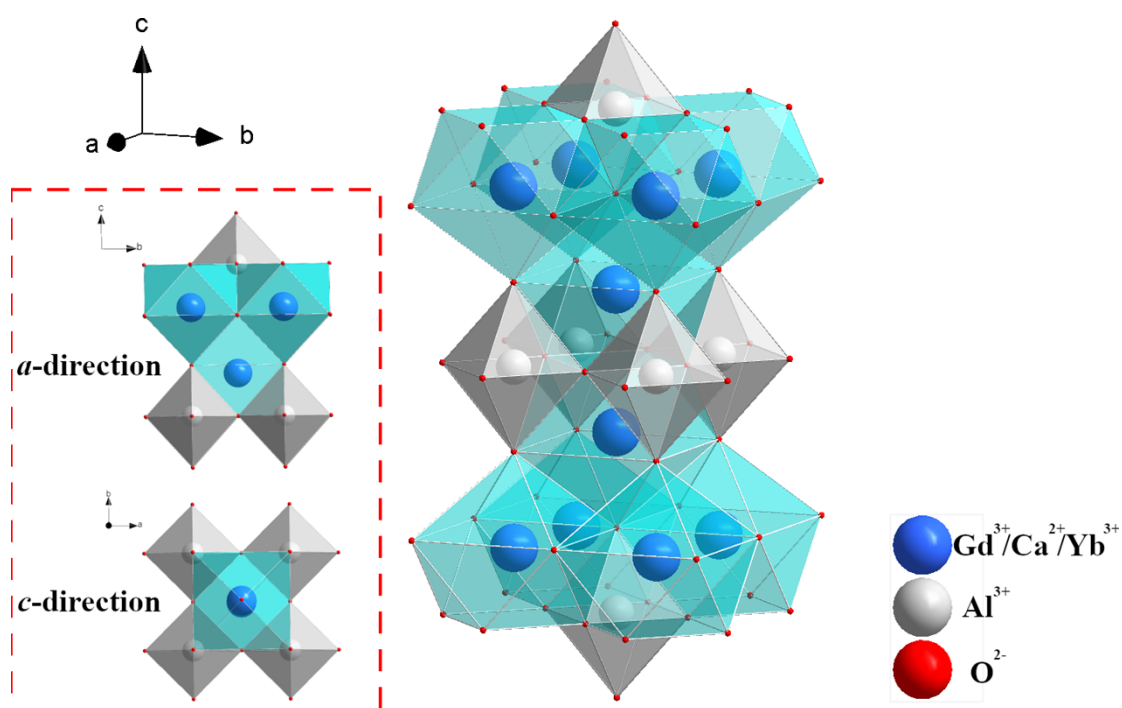

Fig. S1. The structure of Yb: CALGO crystal.

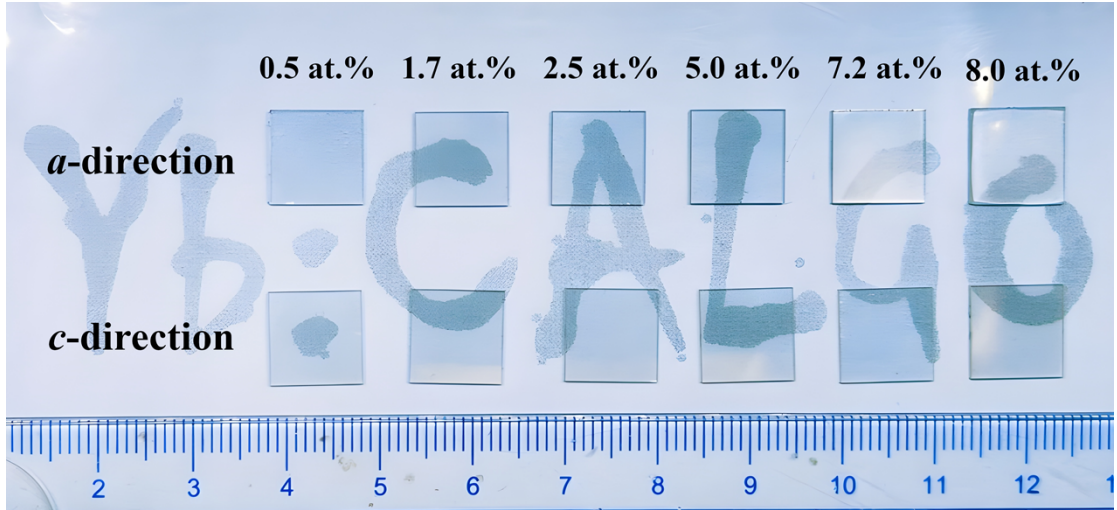

**Fig. S2.** The photograph of the Yb: CALGO crystal plates.

**Table S1.** The mass percent of Yb<sup>3+</sup>, Gd<sup>3+</sup>, Ca<sup>2+</sup>, and Al<sup>3+</sup> in Yb:CALGO crystals measured by ICP

| Initial doped Yb <sup>3+</sup> conc. (at.%) | The mass percent measured by ICP (%) |                  |                  |                  |
|---------------------------------------------|--------------------------------------|------------------|------------------|------------------|
|                                             | Yb <sup>3+</sup>                     | Gd <sup>3+</sup> | Ca <sup>3+</sup> | Al <sup>3+</sup> |
| 1                                           | 0.29                                 | 46.41            | 11.65            | 8.48             |
| 3                                           | 0.90                                 | 47.06            | 12.48            | 8.38             |
| 5                                           | 1.26                                 | 45.44            | 10.49            | 7.85             |
| 10                                          | 3.15                                 | 53.90            | 16.60            | 9.78             |
| 12                                          | 3.65                                 | 46.02            | 11.23            | 7.90             |
| 14                                          | 4.64                                 | 49.19            | 12.76            | 9.04             |

**Table S2.** The calculated atomic coefficients of Yb, Gd, Ca, and Al in Yb:CALGO crystals when the reference atom is Gd, Ca, and Al

| The reference ion | Initial doped Yb <sup>3+</sup> conc. (at.%) | Yb    | Gd    | Ca    | Al    |
|-------------------|---------------------------------------------|-------|-------|-------|-------|
| Gd <sup>3+</sup>  | 1                                           | 0.006 | 1     | 0.985 | 1.065 |
|                   | 3                                           | 0.017 | 1     | 1.041 | 1.038 |
|                   | 5                                           | 0.025 | 1     | 0.906 | 1.007 |
|                   | 10                                          | 0.056 | 1     | 1.245 | 1.109 |
|                   | 12                                          | 0.072 | 1     | 0.958 | 1.000 |
|                   | 14                                          | 0.086 | 1     | 1.018 | 1.072 |
| Ca <sup>2+</sup>  | 1                                           | 0.006 | 1.015 | 1     | 1.081 |
|                   | 3                                           | 0.017 | 0.961 | 1     | 0.998 |
|                   | 5                                           | 0.028 | 1.104 | 1     | 1.112 |
|                   | 10                                          | 0.045 | 0.803 | 1     | 0.891 |
|                   | 12                                          | 0.075 | 1.044 | 1     | 1.045 |

|                  |    |       |       |       |       |
|------------------|----|-------|-------|-------|-------|
|                  | 14 | 0.084 | 0.982 | 1     | 1.053 |
| Al <sup>3+</sup> | 1  | 0.005 | 0.939 | 0.925 | 1     |
|                  | 3  | 0.017 | 0.963 | 1.003 | 1     |
|                  | 5  | 0.025 | 0.993 | 0.900 | 1     |
|                  | 10 | 0.050 | 0.902 | 1.122 | 1     |
|                  | 12 | 0.072 | 0.999 | 0.957 | 1     |
|                  | 14 | 0.080 | 0.933 | 0.950 | 1     |

**Table S3.** The calculated segregation coefficients of the Yb<sup>3+</sup> in Yb:CALGO crystals when the referent ion is Al<sup>3+</sup>

| Initial doped Yb <sup>3+</sup> conc. (at.%)     | 1 at.% | 3 at.% | 5 at.% | 10 at.% | 12 at.% | 14 at.% |
|-------------------------------------------------|--------|--------|--------|---------|---------|---------|
| The segregation coefficient of Yb <sup>3+</sup> | 0.50   | 0.57   | 0.50   | 0.50    | 0.60    | 0.57    |

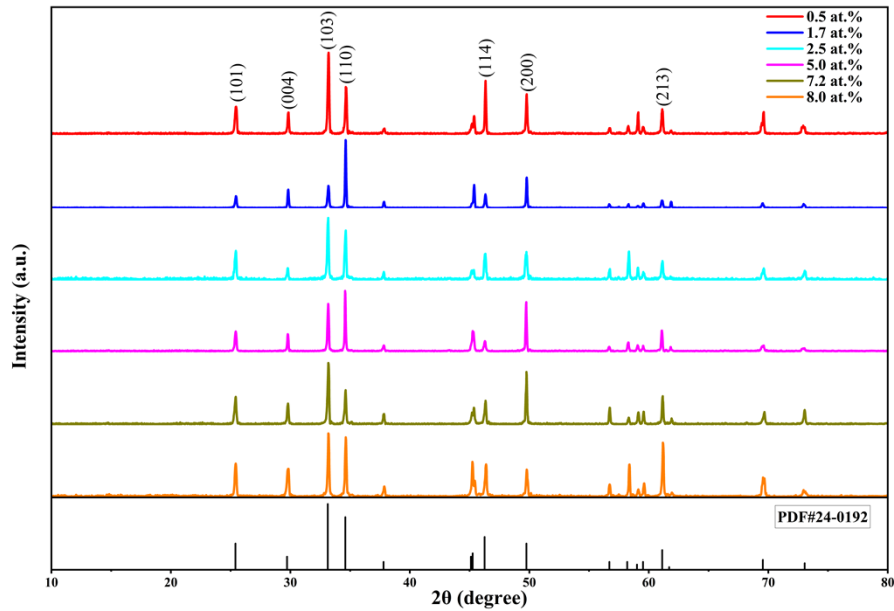

**Fig. S3.** XRD patterns of the as-grown Yb:CALGO single crystals.

**Table S4.** The calculated lattice parameters of Yb:CALGO crystals

|                                     | Samples           | a (Å) | c (Å)  | V (Å <sup>3</sup> ) | Ref.      |
|-------------------------------------|-------------------|-------|--------|---------------------|-----------|
| Calculated<br>lattice<br>parameters | 0.5 at.% Yb:CALGO | 3.661 | 11.995 | 160.768             | This work |
|                                     | 1.7 at.% Yb:CALGO | 3.662 | 11.991 | 160.802             | This work |
|                                     | 2.5 at.% Yb:CALGO | 3.660 | 11.989 | 160.560             | This work |
|                                     | 5.0 at.% Yb:CALGO | 3.661 | 11.987 | 160.660             | This work |
|                                     | 7.2 at.% Yb:CALGO | 3.663 | 11.991 | 160.890             | This work |
|                                     | 8.0 at.% Yb:CALGO | 3.662 | 11.981 | 160.668             | This work |

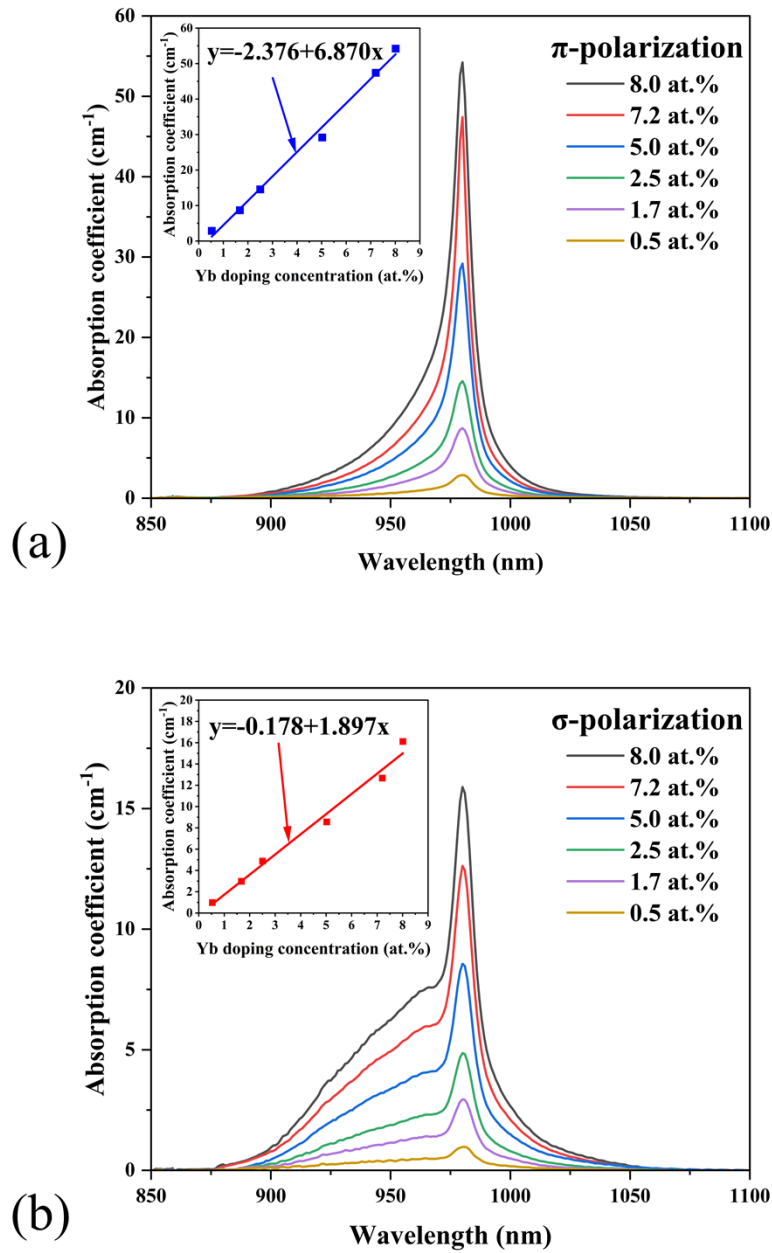

Fig. S4. (a) and (b) represent the  $\pi$  and  $\sigma$  polarized absorption spectra of Yb:CALGO, respectively. The graphs embedded within them show the dependence of the absorption coefficient at the central wavelength on the  $\text{Yb}^{3+}$  doping concentration.

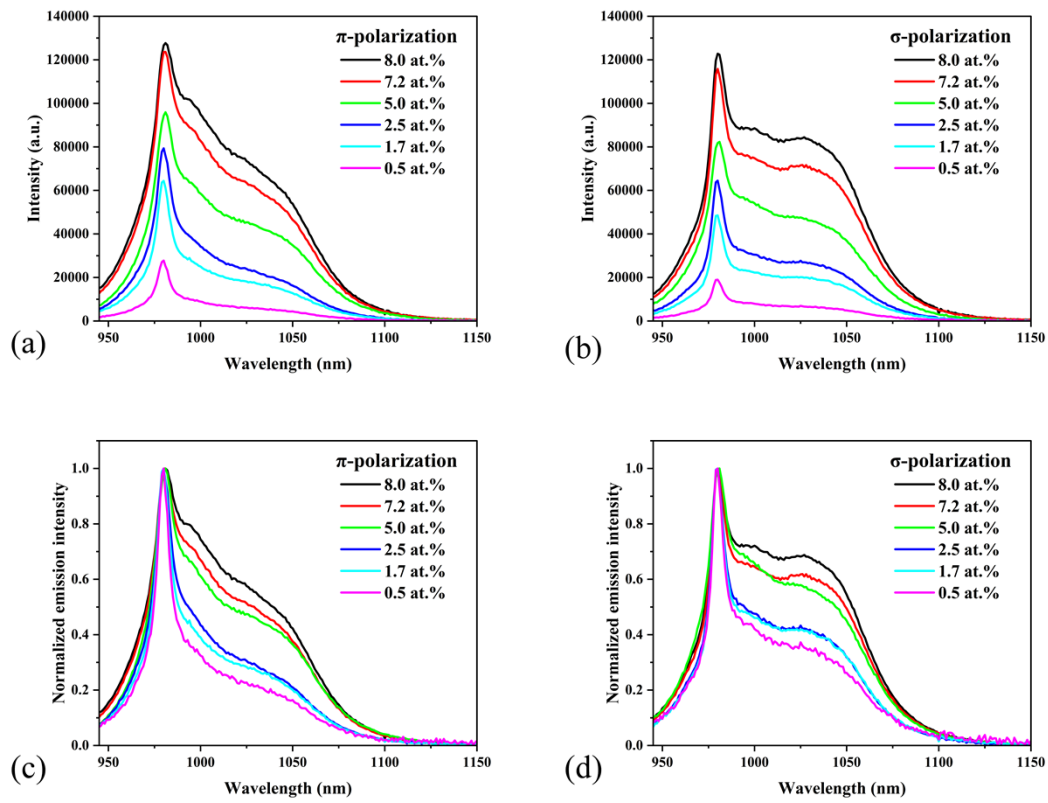

Fig. S5. (a) and (b) present the  $\pi$  and  $\sigma$  polarized emission spectra of Yb: CALGO, respectively. (c) and (d) present the normalized emission spectra relative to their peak intensity. The spectra were measured under 932 nm excitation at room temperature.

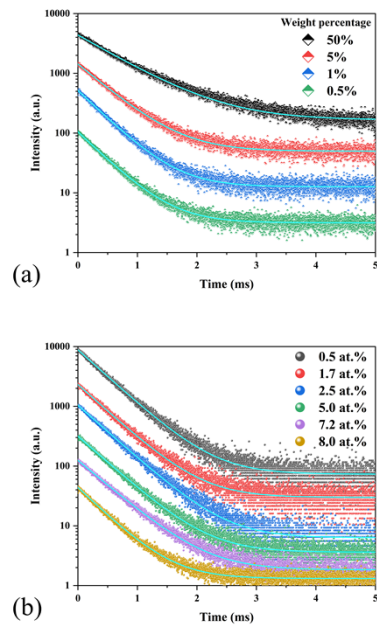

Fig. S6. (a) presents the fluorescence decay curves of samples composed of 8.0 at.% Yb:CALGO mixed with pure CALGO, with Yb:CALGO weight percentage of 50%, 5%, 1% and 0.5%, respectively. (b) presents the fluorescence decay curves of different Yb<sup>3+</sup> concentration.

**Table S5.** The FWHMs in the  $\pi$  and  $\sigma$  polarization of the emission spectra and the fluorescence lifetime with the weight percentage of 0.5% in Yb:CALGO crystals

| Yb <sup>3+</sup> doping conc. (at.%) | FWHM (nm)              |                           | The fluorescence lifetime (ms) |
|--------------------------------------|------------------------|---------------------------|--------------------------------|
|                                      | the $\pi$ polarization | the $\sigma$ polarization |                                |
| 0.5                                  | 11.23                  | 12.32                     | 0.490                          |
| 1.7                                  | 14.31                  | 15.26                     | 0.489                          |
| 2.5                                  | 20.12                  | 19.55                     | 0.503                          |
| 5.0                                  | 43.35                  | 71.77                     | 0.501                          |
| 7.2                                  | 58.03                  | 75.75                     | 0.527                          |
| 8.0                                  | 68.75                  | 79.86                     | 0.454                          |

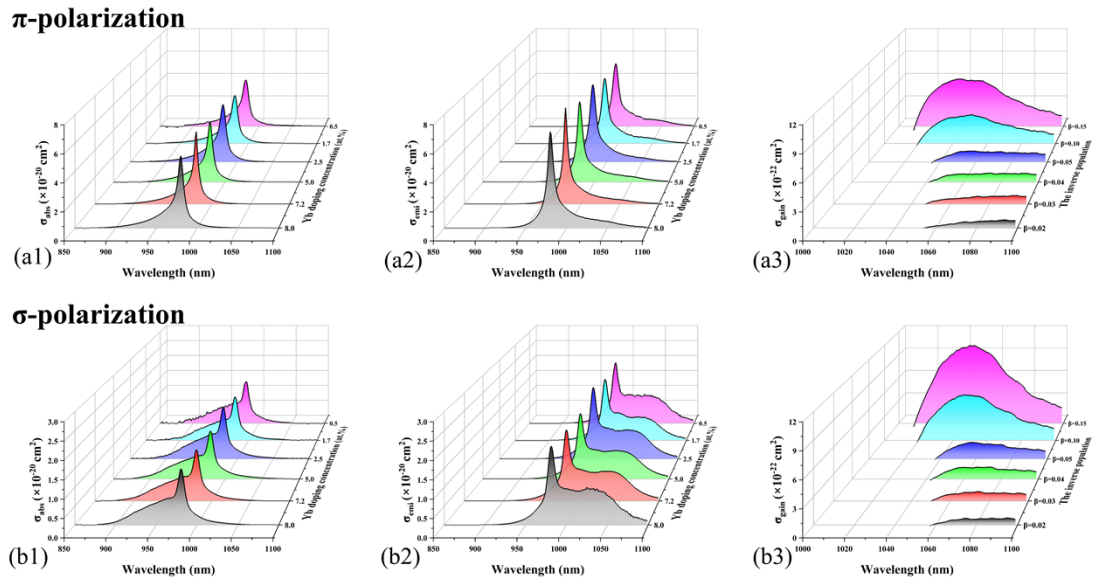

**Fig. S7.** (a1), (a2) and (a3) represent the absorption, emission cross-sections of a series of Yb<sup>3+</sup> doped CALGO crystals and the gain cross-sections of 8.0 at.% Yb:CALGO crystal in  $\pi$  polarization, respectively. (b1), (b2) and (b3) represent the absorption, emission cross-sections of a series of Yb<sup>3+</sup> doped CALGO crystals and the gain cross-sections of 8.0 at.% Yb:CALGO crystal in  $\sigma$  polarization, respectively.

**Table S6.** Comparison of the cross-sections of Yb:CALGO in this work with those of several other crystals.

| Crystals | Yb conc. (at%) | Growth method | $\sigma_{abs}$ ( $10^{-20}$ cm <sup>2</sup> ) |          | $\sigma_{emi}$ ( $10^{-20}$ cm <sup>2</sup> ) |           | Reference |
|----------|----------------|---------------|-----------------------------------------------|----------|-----------------------------------------------|-----------|-----------|
|          |                |               | $\pi$                                         | $\sigma$ | $\pi$                                         | $\sigma$  |           |
| Yb:CALGO | 0.5            | Cz            | 4.07@980                                      | 1.37@980 | 5.50@ 980                                     | 1.99@980  | This work |
|          |                |               | nm                                            | nm       | nm                                            | 0.86@1040 |           |
|          |                |               |                                               |          |                                               | nm        |           |
|          | 1.7            |               | 4.05@980                                      | 1.37@980 | 5.49@ 980                                     | 1.92@980  |           |
|          |                |               | nm                                            | nm       | nm                                            | nm        |           |

|                                                    |     |      |                                  |                  |                                                     |                   |      |
|----------------------------------------------------|-----|------|----------------------------------|------------------|-----------------------------------------------------|-------------------|------|
|                                                    |     |      |                                  |                  |                                                     | 0.73@1040<br>nm   |      |
|                                                    |     |      | 4.65@980<br>nm                   | 1.56@980<br>nm   | 6.24@ 980<br>nm                                     | 2.17@980<br>nm    |      |
| 2.5                                                |     |      |                                  |                  |                                                     | 0.84@1040<br>nm   |      |
|                                                    |     |      | 4.66@980<br>nm                   | 1.39@980<br>nm   | 6.23@ 980<br>nm                                     | 1.90@980<br>nm    |      |
| 5.0                                                |     |      |                                  |                  |                                                     | 0.79@1040<br>nm   |      |
|                                                    |     |      | 5.35@980<br>nm                   | 1.43@980<br>nm   | 7.14@ 980<br>nm                                     | 1.91@980<br>nm    |      |
| 7.2                                                |     |      |                                  |                  |                                                     | 0.81@1040<br>nm   |      |
|                                                    |     |      | 5.10@980<br>nm                   | 1.49@980<br>nm   | 6.81@ 980<br>nm                                     | 2.02@980<br>nm    |      |
| 8.0                                                |     |      |                                  |                  |                                                     | 0.90@1040<br>nm   |      |
| 8                                                  |     |      | 2.65@ 979<br>nm                  | 1.03@980<br>nm   | 2.23@979<br>nm                                      | 1.43 @ 980<br>nm  | [50] |
| 5.4                                                |     |      | 3.8 @979.6<br>nm                 | 1.4@979.6<br>nm  | 5.5 (at 980<br>nm)                                  | 2.0@980<br>nm     | [51] |
| Yb: CaYAlO <sub>4</sub>                            | 1   | Cz   | 5.68@979<br>nm                   | 1.97@<br>979nm   | --                                                  | 0.80<br>(plateau) | [44] |
| Yb: SrLaAlO <sub>4</sub>                           | 5   | Cz   | 2.58@980.2<br>nm                 | 1.45@980.2<br>nm | 2.88@980.2<br>nm                                    | 0.80<br>(plateau) | [52] |
| Yb: Lu <sub>2</sub> O <sub>3</sub>                 | 3.5 | TGT  | 1.320@976 nm, no<br>polarization |                  | 1.165@1033 nm,<br>0.493@1077 nm, no<br>polarization |                   | [53] |
| Yb: Y <sub>3</sub> Al <sub>5</sub> O <sub>12</sub> | 2   | LHPG | 0.5@943 nm, no<br>polarization   |                  | 2.5@1050 nm, no<br>polarization                     |                   | [54] |

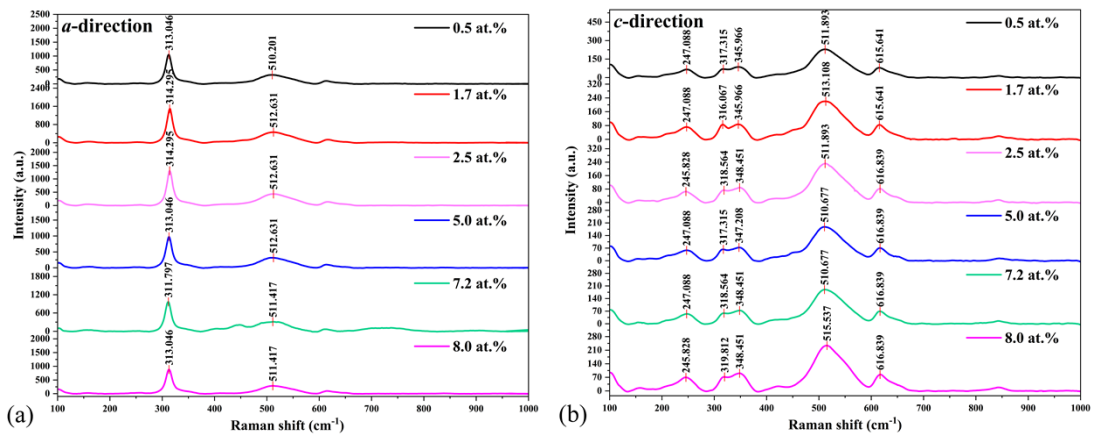

Fig. S8. (a) and (b) present the Raman spectra of Yb:CALGO crystals along the *a*-direction and the *c*-direction, respectively.
